# Supplementary material for: Structural effect of Ni/TiO2 on CO methanation: improved activity and enhanced stability
Source: Royal Society of Chemistry journal article supplement (doi:10.1039/d1ra08021k), 2021-12-24
Supplement: d1ra08021k1.pdf [file d1ra08021k1.pdf]

Supplementary Information

**Structural effect of Ni/TiO<sub>2</sub> on CO methanation: improved activity  
and enhanced stability**

Jie Zhang, Xinyu Jia and Chang-jun Liu\*

School of Chemical Engineering and Technology, Tianjin University, Tianjin 300072,  
China

\* Corresponding author. Tel.: +86 22 27406490.

E-mail addresses: [cjL@tju.edu.cn](mailto:cjL@tju.edu.cn) (C.-J. Liu).

**Table S1** Textural properties of the TiO<sub>2</sub> support and the Ni/TiO<sub>2</sub> catalysts.

| Sample                 | S <sub>BET</sub> (m <sup>2</sup> /g) | V <sub>pore</sub> (cm <sup>3</sup> /g) | D <sub>pore</sub> (nm) |
|------------------------|--------------------------------------|----------------------------------------|------------------------|
| TiO <sub>2</sub>       | 13.2                                 | 0.03                                   | 9.1                    |
| Ni/TiO <sub>2</sub> -C | 14.1                                 | 0.04                                   | 10.2                   |
| Ni/TiO <sub>2</sub> -P | 15.1                                 | 0.03                                   | 8.5                    |

The Ni  $2p_{3/2}$  spectra of the Ni/TiO<sub>2</sub> catalysts are shown in Fig. S1. The Ni species exists in both elemental state (Ni<sup>0</sup>) centered at 851.8 eV and oxidized state (Ni<sup>2+</sup>) centered at 855.0 eV, along with a satellite located at 860.4 eV.<sup>S1, S2</sup> The oxidic Ni<sup>2+</sup> can be assigned to NiO from the air exposure. Compared to the standard binding energy (BE) of Ni<sup>0</sup> (852.9 eV), the BE of Ni<sup>0</sup> shifted negatively in catalysts, suggesting an electron transfer from TiO<sub>2</sub> to Ni.<sup>S1</sup> The Ni  $2p_{3/2}$  spectra of Ni/TiO<sub>2</sub>-P catalyst shows more intensive peaks, indicating a better dispersion on the surface.<sup>S3</sup> This is consistent with our conclusion that Ni/TiO<sub>2</sub>-P catalyst possesses smaller Ni particle size and higher Ni dispersion.

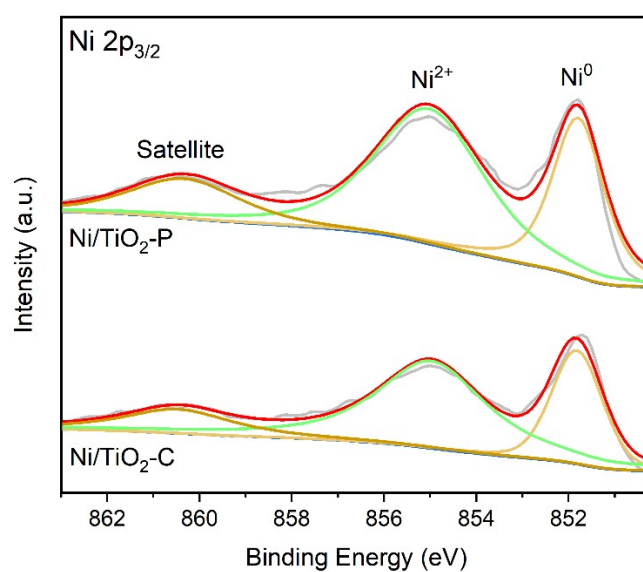

**Fig. S1** Ni  $2p_{3/2}$  XPS spectra of Ni/TiO<sub>2</sub>-P and Ni/TiO<sub>2</sub>-C.

The dispersion of Ni nanoparticles ( $D_{Ni}$ ) was estimated by assuming Ni nanoparticle as a sphere, following the equations: <sup>S4</sup>

$$D_{Ni} = \frac{n_s}{n} = \frac{4\pi \cdot R^2 \cdot a_m}{\frac{4\pi}{3} \cdot R^3 \cdot \rho_0 \cdot \frac{N_A}{M}}$$

$$R = \frac{d}{2}$$

Where  $n_s$  is the number of Ni atoms on the surface of the sphere;  $n$  is the total number of Ni atoms in the sphere;  $d$  is the mean diameter of Ni nanoparticles obtained from XRD;  $a_m$  is the number of surface Ni atoms per unit  $m^2$ , which is  $1.54 \times 10^{19} m^{-2}$  calculated for fcc Ni using the proportions of low index planes fcc (111): (100): (110) = 1: 1: 1;<sup>S4</sup>  $\rho_0$  is the density of Ni,  $8.902 \times 10^6 g \cdot m^{-3}$ ;  $N_A$  is  $6.02 \times 10^{23} mol^{-1}$ ;  $M$  is the atomic weight of Ni,  $58.69 g \cdot mol^{-1}$ .

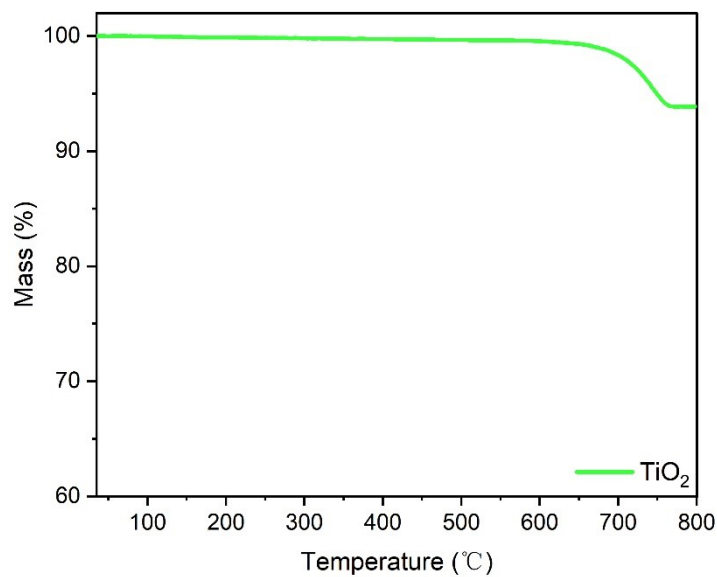

**Fig. S2** TG curve of TiO<sub>2</sub>.

## References

- [S1] W. Lin, H. Cheng, L. He, Y. Yu and F. Zhao, *J. Catal.*, 2013, **303**, 110-116.
- [S2] J. Wang, K. Chang, Z. Sun, J. H. Lee, B. M. Tackett, C. Zhang, J. G. Chen and C.-J. Liu, *Appl. Catal. B-Environ.*, 2019, **251**, 162-167.
- [S3] N. Rui, X. Zhang, F. Zhang, Z. Liu, X. Cao, Z. Xie, R. Zou, S. D. Senanayake, Y. Yang, J. A. Rodriguez and C.-J. Liu, *Appl. Catal. B-Environ.*, 2021, **282**, 119581.
- [S4] Y. Lin, Y. Zhu, X. Pan and X. Bao, *Catal. Sci. Technol.*, 2017, **7**, 2813-2818.
